# Supplementary figures and images for: TiO2 nanocrystals – assisted laser desorption and ionization time-of-flight mass spectrometric analysis of steroid hormones, amino acids and saccharides. Validation and comparison of methods
Source: Royal Society of Chemistry journal article supplement (doi:10.1039/c5ra20042c), 2015-12-03

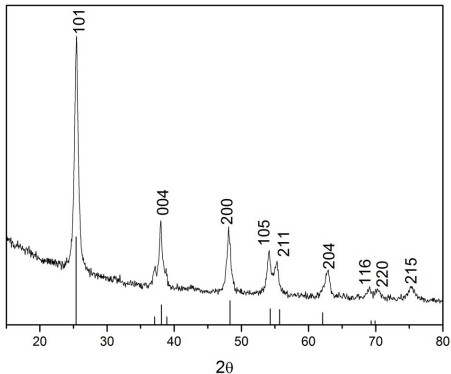

Supplement: c5ra20042c1.pdf [file c5ra20042c1.pdf]
